# Supplementary material for: Nuclear translocation of mitochondrial dehydrogenases as an adaptive cardioprotective mechanism
Source: PubMed Central journal article supplement (PMC10356764; doi:10.1038/s41467-023-40084-5), 2023-07-19
Supplement: 41467_2023_40084_MOESM2_ESM.pdf [file 41467_2023_40084_MOESM2_ESM.pdf]

### Nuclear translocation of mitochondrial dehydrogenases as an adaptive cardioprotective mechanism

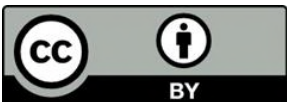

**Open Access** This file is licensed under a Creative Commons Attribution 4.0 International License, which permits use, sharing, adaptation, distribution and reproduction in any medium or format, as long as you give appropriate credit to the original author(s) and the source, provide a link to the Creative Commons license, and indicate if changes were made. In the cases where the authors are anonymous, such as is the case for the reports of anonymous peer reviewers, author attribution should be to 'Anonymous Referee' followed by a clear attribution to the source work. The images or other third party material in this file are included in the article's Creative Commons license, unless indicated otherwise in a credit line to the material. If material is not included in the article's Creative Commons license and your intended use is not permitted by statutory regulation or exceeds the permitted use, you will need to obtain permission directly from the copyright holder. To view a copy of this license, visit <http://creativecommons.org/licenses/by/4.0/>.

**Editorial Note:** This manuscript has been previously reviewed at another journal that is not operating a transparent peer review scheme. This document only contains reviewer comments and rebuttal letters for versions considered at Nature Communications.

## REVIEWERS' COMMENTS

Reviewer #1 (Remarks to the Author):

The authors have made notable improvements by providing additional evidence for the nuclear localization of the dehydrogenases and expanding the range of ATAC-qPCR targets to demonstrate the impact of nuclear IDH-2 on chromatin accessibility. Please list the primers used for ATAC-qPCR in a supplementary table.

Reviewer #2 (Remarks to the Author):

In this manuscript, the authors reported adaptive mechanisms of cardiomyocytes in response to doxorubicin induced cardiotoxicity. They observed translocation of select mitochondrial TCA cycle proteins including PDH-E1, MDH-2, and IDH-2 both in vitro using iPSC-derived cardiomyocytes and in vivo. They then showed lentivirus induced nuclear expression of these mitochondrial enzymes prevented doxorubicin-induced cardiomyocyte cell death as well as DNA injury.

Overall, I believe the authors satisfactorily addressed my previous comments, as described below:

1. I previously requested additional experiment regarding what would happen to mice injected with NLS-IDH2 vs control with PBS to see whether NLS-IDH2 would improve LVEF baseline in the absence of doxorubicin. The authors appropriately addressed this concern and showed that there is no functional change at baseline between NLS-IDH2 vs PBS based on LVEF and FS changes.

2. In my request to address rationale behind picking select genes (KCNH, CasQ, TnT) for

ATAC-qPCR, the authors first categorized genes based on their functional consequences (e.g. anti-apoptosis, anti-oxidant, contractility, calcium handling, and metabolism) and showed that select genes in these categories with newly open chromatin resulted in increased RNA expression at 24 hour mark, as presented in new Figure 5 (although as the authors pointed out, some genes with open chromatin didn't necessarily result in increased RNA expression).

I assume it might be due to the effort to fit all figures into one, the current Figure 5 is a bit difficult to follow. I suggest to show ATAC then mRNA qPCR results for the each category.

3. In our previous comment, we raised concern regarding 1) unusual/inconsistent ventricular beating rates of iPSC-CMs and 2) contraction velocity that appears to suggest improved, not worsened contraction, after IDH2 trans-location.

In response to this, the authors first commented that baseline iPSC-CM beating rates can be as high as 100s. While I do wonder if the baseline beating rate is in the range of 100s, it may resemble more atrial-like CM, I see that the contraction figure on 3C, the beating rate is only 48 BPM (16 peaks in the span of 20 seconds).

Additionally, in addition to my comment on contraction/relaxation velocity, the authors also included deformation distance which showed significant decrease in response to DRN with near normalization with IDH-2.

## Response to the reviewers

### Reviewer 1

*The authors have made notable improvements by providing additional evidence for the nuclear localization of the dehydrogenases and expanding the range of ATAC-qPCR targets to demonstrate the impact of nuclear IDH-2 on chromatin accessibility. Please list the primers used for ATAC-qPCR in a supplementary table.*

**Response:** We thank the reviewer for their suggestions and we have included the requested primer table in the revised manuscript.

### Reviewer 2:

*In this manuscript, the authors reported adaptive mechanisms of cardiomyocytes in response to doxorubicin induced cardiotoxicity. They observed translocation of select mitochondrial TCA cycle proteins including PDH-E1, MDH-2, and IDH-2 both in vitro using iPSC-derived cardiomyocytes and in vivo. They then showed lentivirus induced nuclear expression of these mitochondrial enzymes prevented doxorubicin-induced cardiomyocyte cell death as well as DNA injury.*

*Overall, I believe the authors satisfactorily addressed my previous comments, as described below:*

*1. I previously requested additional experiment regarding what would happen to mice injected with NLS-IDH2 vs control with PBS to see whether NLS-IDH2 would improve LVEF baseline in the absence of doxorubicin. The authors appropriately addressed this concern and showed that there is no functional change at baseline between NLS-IDH2 vs PBS based on LVEF and FS changes.*

**Response:** We thank the reviewer for accepting our revisions.

*2. In my request to address rationale behind picking select genes (KCNH, CasQ, TnT) for ATAC-qPCR, the authors first categorized genes based on their functional consequences (e.g. anti-apoptosis, anti-oxidant, contractility, calcium handling, and metabolism) and showed that select genes in these categories with newly open chromatin resulted in increased RNA expression at 24 hour mark, as presented in new Figure 5 (although as the authors pointed out, some genes with open chromatin didn't necessarily result in increased RNA expression).*

*I assume it might be due to the effort to fit all figures into one, the current Figure 5 is a bit difficult to follow. I suggest to show ATAC then mRNA qPCR results for the each category.*

**Response:** We have now split **Figure 5** into two figures by separating ATAC-qPCR (**new Fig 5**) and mRNA-qPCR (**new Fig 6**).

*3. In our previous comment, we raised concern regarding 1) unusual/inconsistent ventricular beating rates of iPSC-CMs and 2) contraction velocity that appears to suggest improved, not worsened contraction, after IDH2 trans-location.*

*In response to this, the authors first commented that baseline iPSC-CM beating rates can be as high as 100s. While I do wonder if the baseline beating rate is in the range of 100s, it may*

*resemble more atrial-like CM, I see that the contraction figure on 3C, the beating rate is only 48 BPM (16 peaks in the span of 20 seconds).*

*Additionally, in addition to my comment on contraction/relaxation velocity, the authors also included deformation distance which showed significant decrease in response to DRN with near normalization with IDH-2.*

**Response:** We thank the reviewer for accepting our revisions.
